# Supplementary material for: Enhancing Pharmacy Student Learning and Perceptions of Medical Apps
Source: PubMed Central journal article supplement (PMC4882412; doi:10.2196/mhealth.4843), 2016-05-12
Supplement: mhealth_v4i2e55_app1.pdf [file mhealth_v4i2e55_app1.pdf]

**Medical Apps Survey 1**

   P1      P2      P3

| Please indicate your agreement with the following statements on a 5 point scale:                                                                                 | 1 =<br>Strongly<br>Disagree | 2 =<br>Disagree | 3 =<br>Neutral | 4 =<br>Agree | 5 =<br>Strongly<br>Agree |
|------------------------------------------------------------------------------------------------------------------------------------------------------------------|-----------------------------|-----------------|----------------|--------------|--------------------------|
| I know how to find medical or pharmacy apps that are useful to me                                                                                                |                             |                 |                |              |                          |
| I know how to evaluate medical or pharmacy apps                                                                                                                  |                             |                 |                |              |                          |
| I know how to use medical or pharmacy apps to enhance the care I provide to patients in pharmacy practice learning environments (i.e., experiential, internship) |                             |                 |                |              |                          |
| I know how to use medical or pharmacy apps to help me study or complete classroom-based assignments                                                              |                             |                 |                |              |                          |
| Using a mobile device improves my efficiency                                                                                                                     |                             |                 |                |              |                          |
| Medical or pharmacy apps are beneficial to pharmacy practice                                                                                                     |                             |                 |                |              |                          |
| Mobile technology will influence pharmacy practice in the future                                                                                                 |                             |                 |                |              |                          |
| Mobile technology should be integrated into pharmacy curricula                                                                                                   |                             |                 |                |              |                          |

Do you own a smartphone?

Yes    No

What type of smartphone do you have?

Android Phone (e.g. Samsung Galaxy, Nexus 5)

iPhone

Blackberry Phone

Windows Phone (e.g. Lumia, HTC 8X)

I do not own a smartphone

Other (specify) \_\_\_\_\_

Do you own any portable electronic devices (e.g. tablet computer, iPad)?

Yes    No

Please indicate all other portable electronic device(s) you use regularly.

- |                                         |                                                                    |
|-----------------------------------------|--------------------------------------------------------------------|
| <input type="checkbox"/> iPad           | <input type="checkbox"/> Android based Tablet (e.g. Nexus 7)       |
| <input type="checkbox"/> iPad Mini      | <input type="checkbox"/> Palm                                      |
| <input type="checkbox"/> iPod           | <input type="checkbox"/> I do not own a portable electronic device |
| <input type="checkbox"/> Surface RT/Pro | <input type="checkbox"/> Other (please list): _____                |
| <input type="checkbox"/> Kindle         |                                                                    |
| <input type="checkbox"/> Nook           |                                                                    |

| How often do you use your mobile device: | Never | Daily | Weekly | Monthly | Quarterly |
|------------------------------------------|-------|-------|--------|---------|-----------|
| As a Calculator?                         |       |       |        |         |           |
| To play games?                           |       |       |        |         |           |
| To place a phone call?                   |       |       |        |         |           |
| To text?                                 |       |       |        |         |           |
| To explore social media?                 |       |       |        |         |           |
| For scheduling?                          |       |       |        |         |           |

How many total non-medical/pharmacy apps do you currently have installed on any portable electronic device(s) (including smartphones) you use regularly?

- |                                      |                                       |
|--------------------------------------|---------------------------------------|
| <input type="checkbox"/> None or N/A | <input type="checkbox"/> 6-8          |
| <input type="checkbox"/> 1-2         | <input type="checkbox"/> 9-10         |
| <input type="checkbox"/> 3-5         | <input type="checkbox"/> more than 10 |

How many total medical or pharmacy apps do you currently have installed on any portable electronic device(s) (including smartphones) you use regularly?

- |                                      |                                       |
|--------------------------------------|---------------------------------------|
| <input type="checkbox"/> None or N/A | <input type="checkbox"/> 6-8          |
| <input type="checkbox"/> 1-2         | <input type="checkbox"/> 9-10         |
| <input type="checkbox"/> 3-5         | <input type="checkbox"/> more than 10 |

What type of medical or pharmacy apps do you download? (check all that apply)

- |                                              |                                              |
|----------------------------------------------|----------------------------------------------|
| <input type="checkbox"/> Drug information    | <input type="checkbox"/> Journals            |
| <input type="checkbox"/> Medical Calculators | <input type="checkbox"/> e-Books             |
| <input type="checkbox"/> News                | <input type="checkbox"/> Clinical references |
|                                              | <input type="checkbox"/> Other: _____        |

I learn about new apps from (check all that apply):

- Family
- Friends/Classmates in Pharmacy School
- Friends/Classmates from other Health Professions School(s)
- Medical/Pharmacy Staff where I work
- Facebook
- Twitter
- Blogs
- News
- Professional organizations (specify) \_\_\_\_\_
- Other, specify \_\_\_\_\_
- None of the above or N/A

Which of the following are barriers to using mobile devices in pharmacy (Check all that apply)?

- Lack of knowledge of apps
- Technical difficulty
- Purchasing a device
- Recognizing when it is appropriate to use a mobile device
- Other: \_\_\_\_\_

How much would you be willing to pay for a medical or pharmacy-related app?

- \$0.00    \$0.99    <\$2.99    <\$4.99    <\$9.99

What is your Gender?

- Male    Female

What is your Age (in years)?

- 18-25    25-30    31-35    36-40    41-45    more than 45 years

What is your Race?

- Caucasian    Hispanic    African American/Black    Asian    Other
